# Supplementary material for: Magnesium galvanic cells produce hydrogen and modulate the tumor microenvironment to inhibit cancer growth
Source: PubMed Central journal article supplement (PMC9051066; doi:10.1038/s41467-022-29938-6), 2022-04-28
Supplement: 41467_2022_29938_MOESM2_ESM.pdf [file 41467_2022_29938_MOESM2_ESM.pdf]

# Supporting Information

## **Magnesium galvanic cells produce hydrogen and modulate the tumor microenvironment to inhibit cancer growth**

Nailin Yang<sup>1</sup>, Fei Gong<sup>1</sup>, Bo Liu<sup>1</sup>, Yu Hao<sup>1</sup>, Yu Chao<sup>1</sup>, Huali Lei<sup>1</sup>, Xiaoyuan Yang<sup>1</sup>, Yuehan Gong<sup>1</sup>,  
Xianwen Wang<sup>1</sup>, Zhuang Liu<sup>1\*</sup>, and Liang Cheng<sup>1\*</sup>

<sup>1</sup>Institute of Functional Nano & Soft Materials (FUNSOM), Jiangsu Key Laboratory for Carbon-Based Functional Materials and Devices, Soochow University, Suzhou 215123, China.

\*Corresponding authors: Email: [lcheng2@suda.edu.cn](mailto:lcheng2@suda.edu.cn); [zliu@suda.edu.cn](mailto:zliu@suda.edu.cn)

Supplementary **Fig. 1-2** H<sub>2</sub> generation in 24 h from MgG rods.

Supplementary **Fig. 3** SEM and EDS mapping images of Mg rods.

Supplementary **Fig. 4** EDS spectra of Mg and MgG.

Supplementary **Fig. 5** Characterization of Pt NPs.

Supplementary **Fig. 6** XRD spectrum of Mg rods.

Supplementary **Fig. 7-8** Time-dependent absorption spectra of the MB solution via various treatments.

Supplementary **Fig. 9** O<sub>2</sub> content changes after the reaction between Mg or MgG rods and H<sub>2</sub>O.

Supplementary **Fig. 10** XPS characterization of MgG before and after H<sub>2</sub> generation process.

Supplementary **Fig. 11** Quantitative analysis of the fluorescence intensity of JC-1 monomers in 4T1 cells.

Supplementary **Fig. 12** Flow cytometry data to show DCF-positive CT26 cells after different treatments.

Supplementary **Fig. 13** Relative cell viabilities of 4T1 and CT26 cells after incubation with various Mg<sup>2+</sup> concentrations for 24 h.

Supplementary **Fig. 14** H<sub>2</sub> generation performance of MgG rods and different kinds of the commercialized Mg alloys.

Supplementary **Fig. 15** Relative viabilities of 4T1 cells after various treatments.

Supplementary **Fig. 16** Cell viabilities of 4T1 and CT26 cells cultured with the pure H<sub>2</sub>.

Supplementary **Fig. 17** Flow cytometry analysis of CT26 cells after various treatments.

Supplementary **Fig. 18** Schematic illustration the position of Mg or MgG rods in the tumors of mice or rabbits implanted by a simple implant approach.

Supplementary **Fig. 19** In vivo time-dependent ultrasonic imaging of 4T1 tumor-bearing mice post i.t. implanted with Mg rods.

Supplementary **Fig. 20-21** SEM image and EDS element mapping of MgG rods, and H<sub>2</sub> generation from MgG rods in PBS solutions after implantation into the tumor for 4 h and 24 h.

Supplementary **Fig. 22** The infrared thermal images and temperature change curves of mice tumor.

Supplementary **Fig. 23-24** Flow cytometry gating strategy and flow cytometric analysis results of different cells in tumor.

Supplementary **Fig. 25** Microscopy images of TUNEL stained with the positive controls.

Supplementary **Fig. 26** Individual growth curves of 4T1 tumors.

Supplementary **Fig. 27** The body weight variation of 4T1 tumor-bearing mice.

Supplementary **Fig. 28** Individual growth curves of CT26 tumors.

Supplementary **Fig. 29** Photos of the representative CT26 tumor-bearing mice.

Supplementary **Fig. 30** The body weight variation of CT26 tumor-bearing mice.

Supplementary **Fig. 31** Individual growth curves of PDX tumors.

Supplementary **Fig. 32** The body weight variation of PDX tumor-bearing mice.

Supplementary **Fig. 33** Individual growth curves of VX2 tumors.

Supplementary **Fig. 34** The hematology profiles of mice implanted with MgG rods.

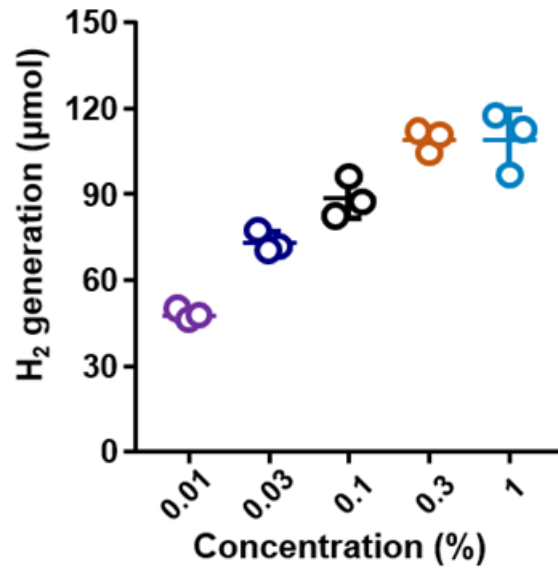

**Supplementary Fig. 1.** H<sub>2</sub> generation in 24 h from MgG rods prepared under different PtCl<sub>6</sub><sup>2-</sup> concentrations as measured by gas chromatography (n = 3 biologically independent samples). Data are presented as mean values ±SD.

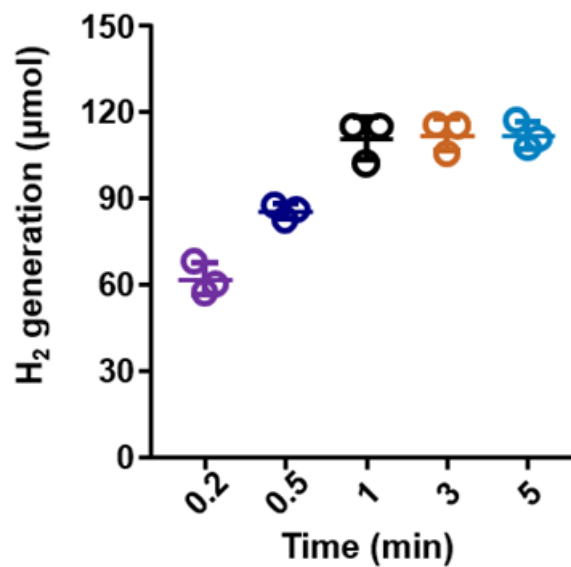

**Supplementary Fig. 2.** H<sub>2</sub> generation in 24 h from MgG rods prepared under different immersion time as measured by gas chromatography (n = 3 biologically independent samples). Data are presented as mean values ±SD.

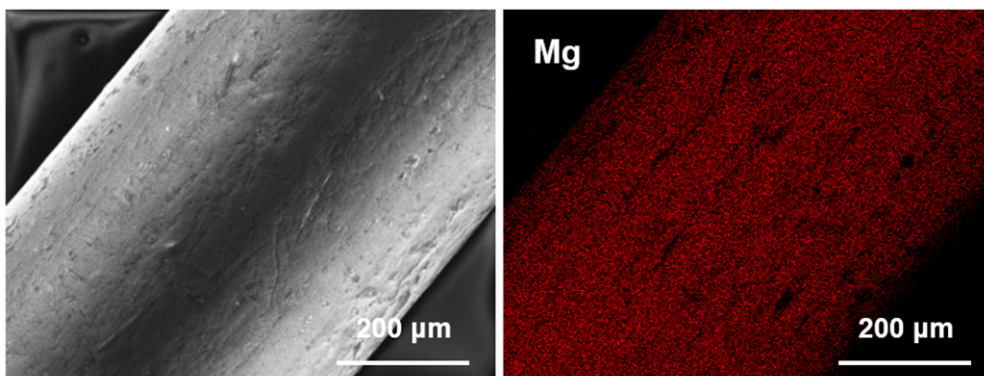

**Supplementary Fig. 3.** SEM and EDS mapping images of Mg rods. A representative image of three biologically independent samples.

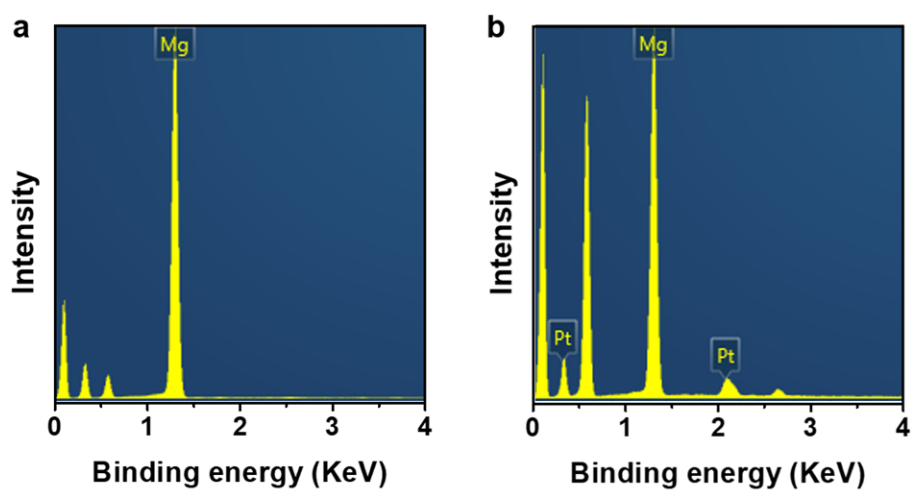

**Supplementary Fig. 4.** EDS spectra of Mg (a) and MgG (b).

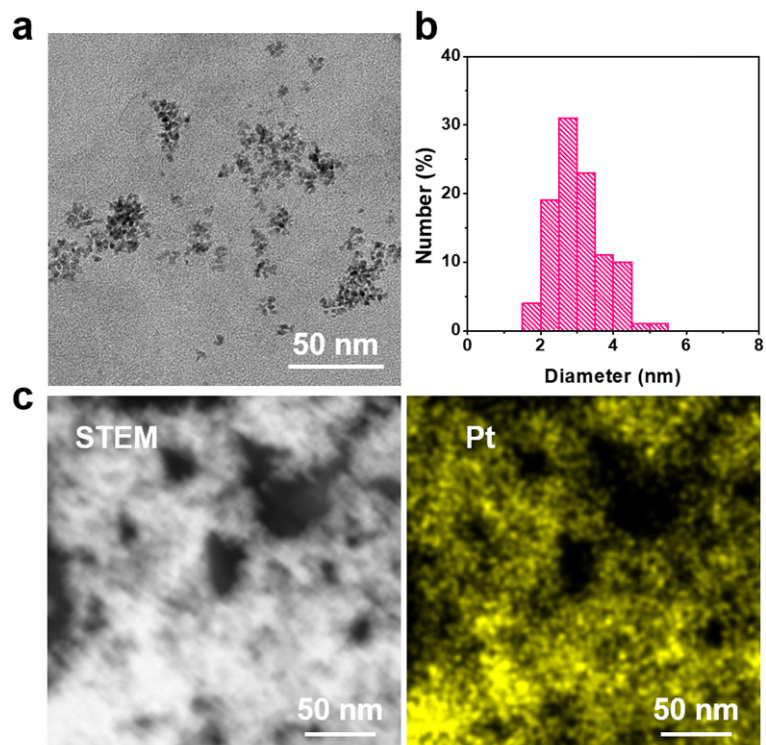

**Supplementary Fig. 5.** Characterization of Pt nanoparticles (NPs). (a) TEM image of Pt NPs. (b) Particle-size distribution (PSD) of Pt NPs determined by TEM image. (c) High-angle annular dark-field scanning TEM (HAADF-STEM) image and elemental mapping of Pt NPs. A representative image of three biologically independent samples is shown in Fig. S5a, c.

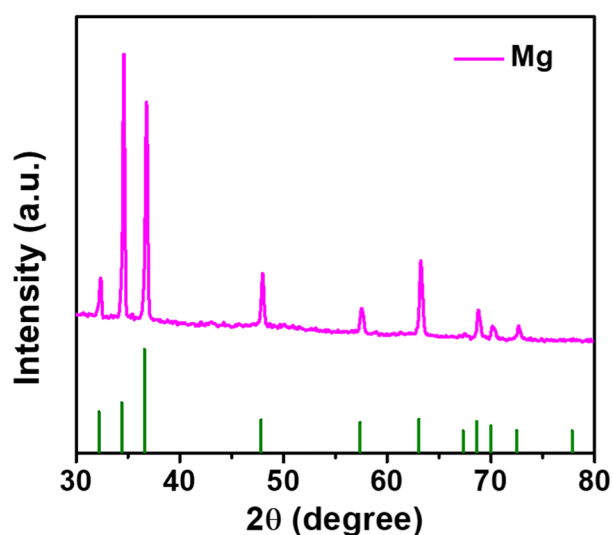

**Supplementary Fig. 6.** XRD spectrum of Mg rods.

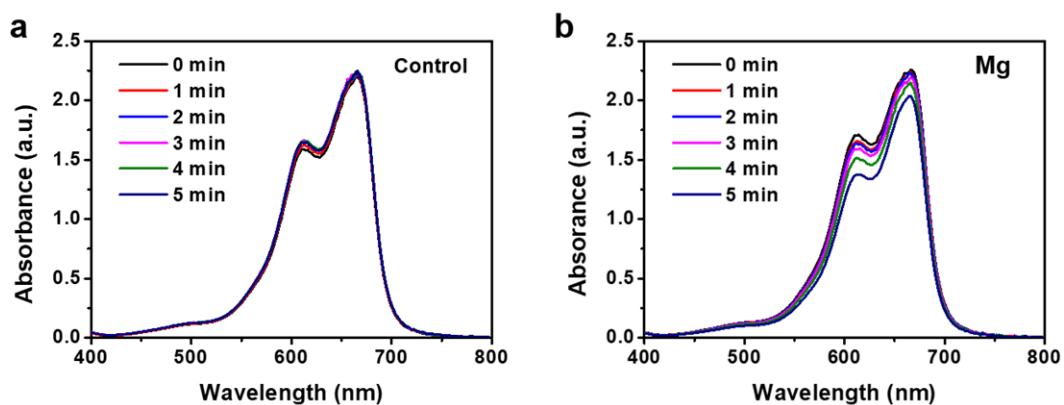

**Supplementary Fig. 7.** Time-dependent absorption spectra of the MB solution (pH = 6.5) via various treatments, including control (a) and Mg rods (b).

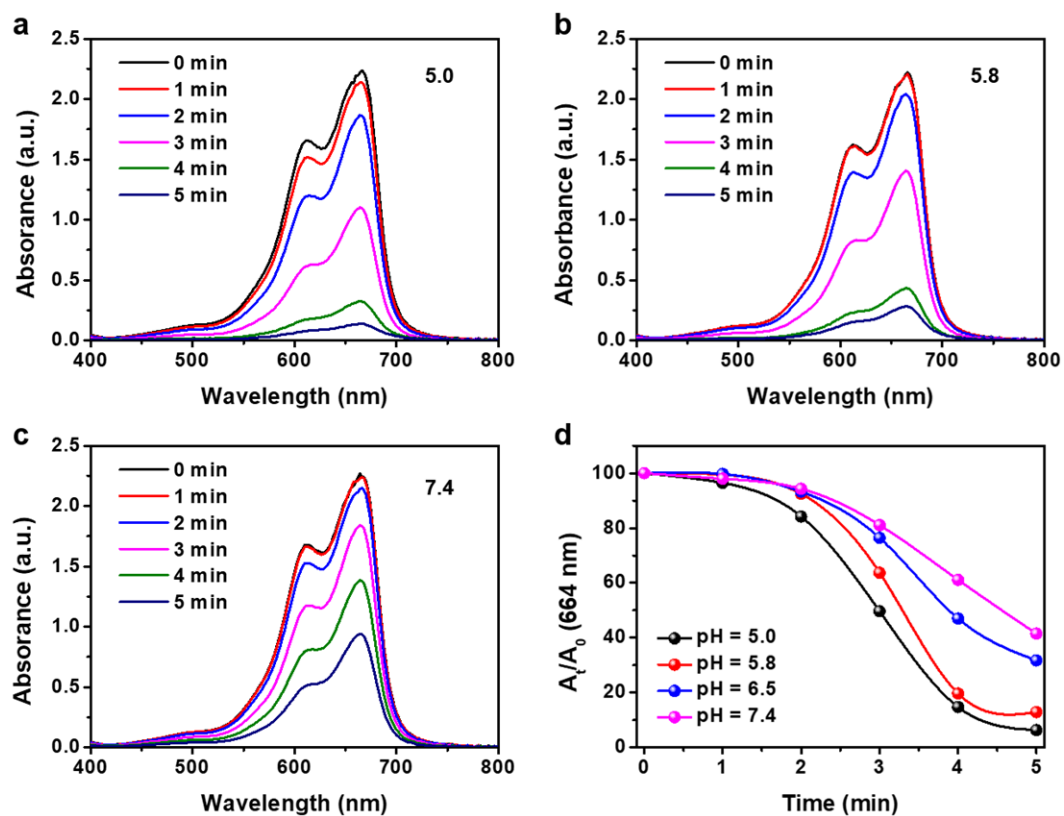

**Supplementary Fig. 8.** (a-c) Time-dependent absorption spectra of the MB solution with different pH values treated with MgG rods. (d) Comparison of MB reduction in PBS solutions with different pH values by MgG rods.

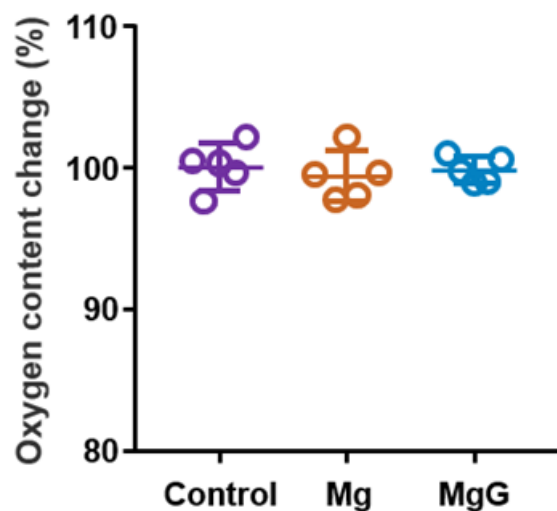

**Supplementary Fig. 9.** O<sub>2</sub> content changes after the reaction between Mg or MgG rods and H<sub>2</sub>O measured by gas chromatography (n=5 biologically independent samples). Data are presented as mean values ±SD.

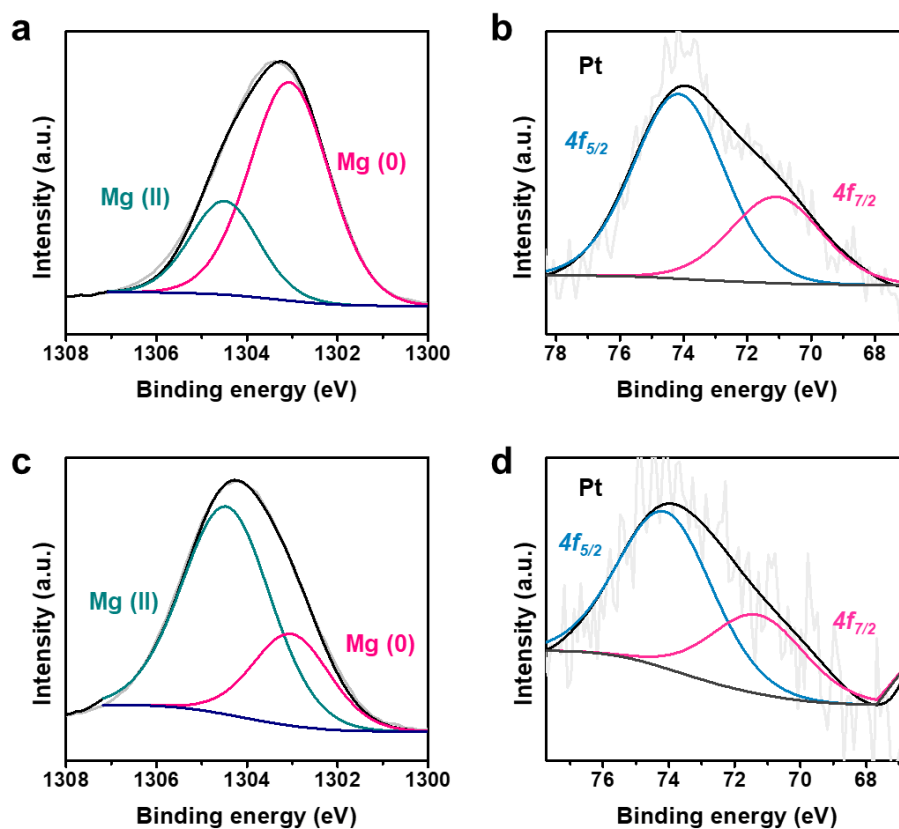

**Supplementary Fig. 10.** XPS characterization of MgG before (a, b) and after (c, d) H<sub>2</sub> generation process.



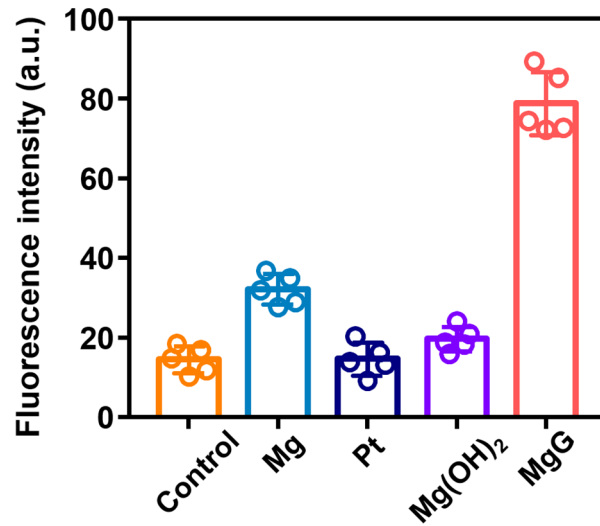

**Supplementary Fig. 11.** Quantitative analysis of the fluorescence intensity of JC-1 monomers in 4T1 cells measured by confocal fluorescence images (n = 5 biologically independent samples). Data are presented as mean values  $\pm$ SD.

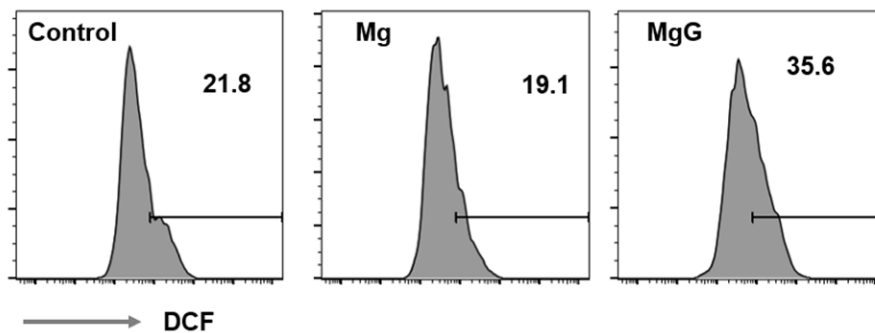

**Supplementary Fig. 12.** Flow cytometry data to show DCF-positive CT26 cells after different treatments.

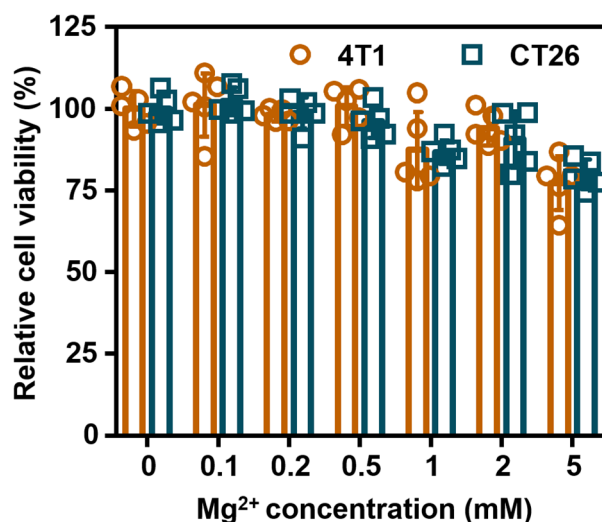

**Supplementary Fig. 13.** Relative cell viabilities of 4T1 and CT26 cells after incubation with various Mg<sup>2+</sup> concentrations for 24 h (n = 5 biologically independent samples). Data are presented as mean values ±SD.

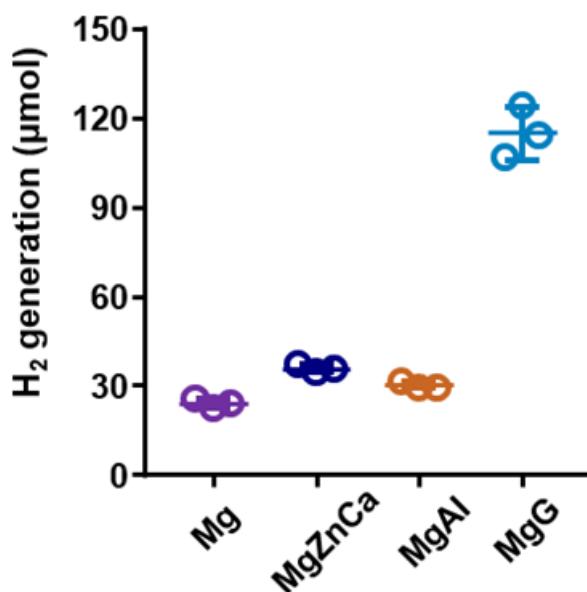

**Supplementary Fig. 14.** H<sub>2</sub> generation performance of MgG rods and different kinds of the commercialized Mg alloys (Mg, MgZnCa, and MgAl) measured by gas chromatography (n = 3 biologically independent samples). Data are presented as mean values ±SD.

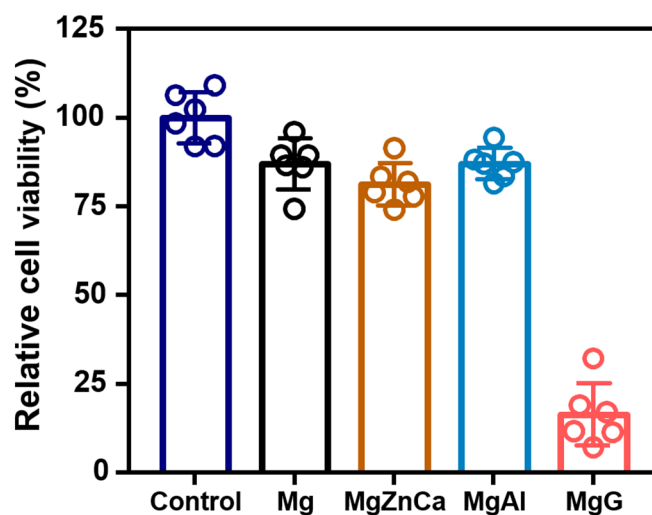

**Supplementary Fig. 15.** Relative viabilities of 4T1 cells after various treatments (Control, Mg, MgZnCa, MgAl, and MgG, n = 6 biologically independent samples). Data are presented as mean values  $\pm$ SD.

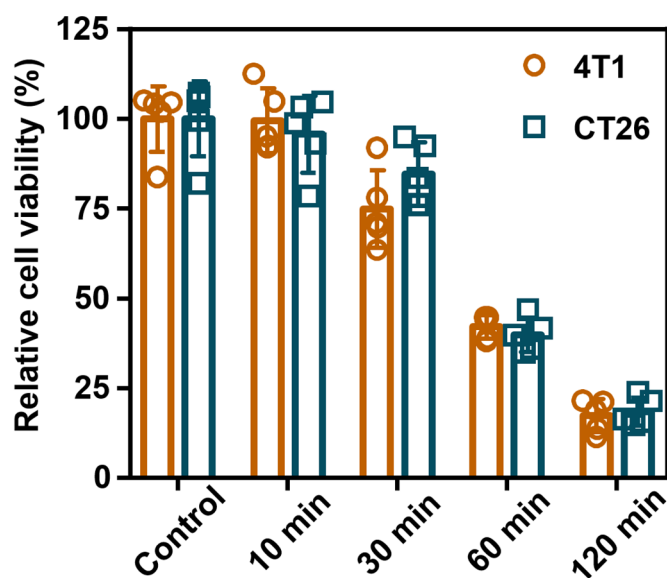

**Supplementary Fig. 16.** Cell viabilities of 4T1 and CT26 cells cultured with the pure H<sub>2</sub> released from a hydrogen balloon for different times (n = 5 biologically independent samples). Data are presented as mean values  $\pm$ SD.

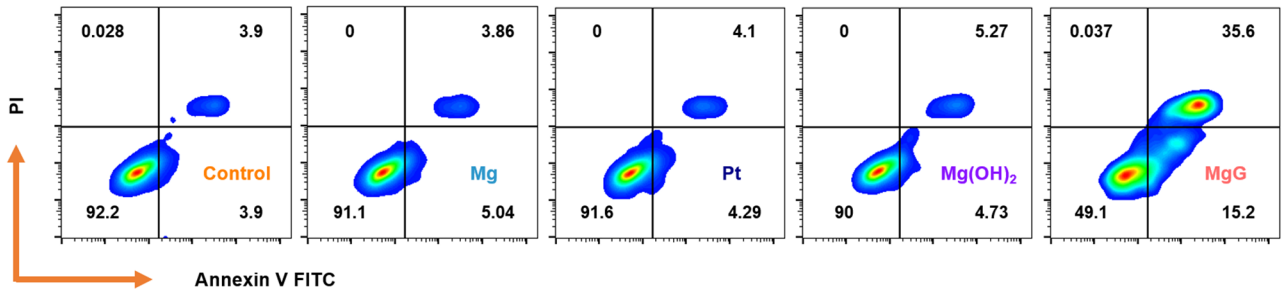

**Supplementary Fig. 17.** Flow cytometry analysis of CT26 cells after various treatments using an Annexin V-FITC/PI kit.

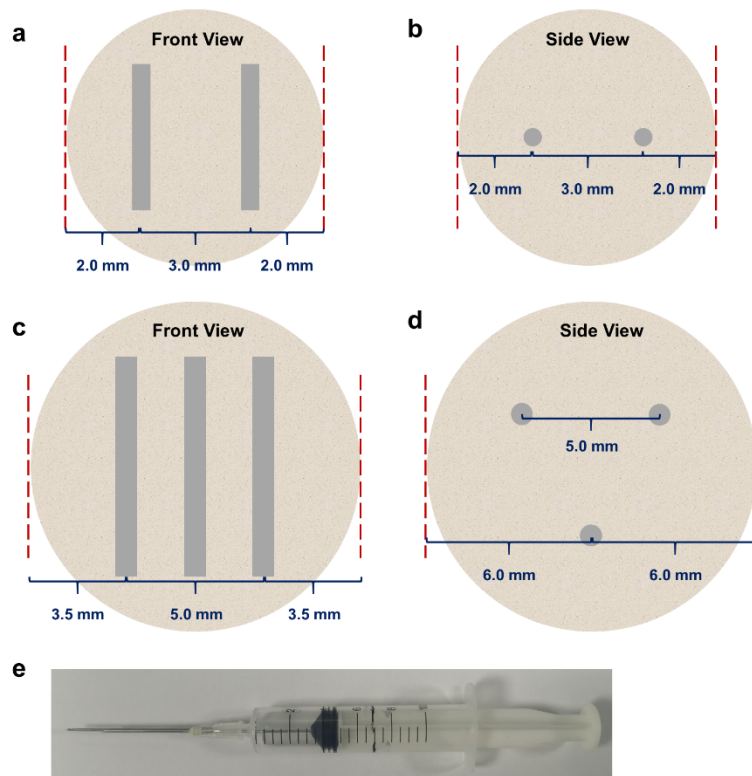

**Supplementary Fig. 18.** Schematic illustration the position of Mg or MgG rods in the tumors of mice (a, b) or rabbits (c, d) implanted by a simple implant approach (e).

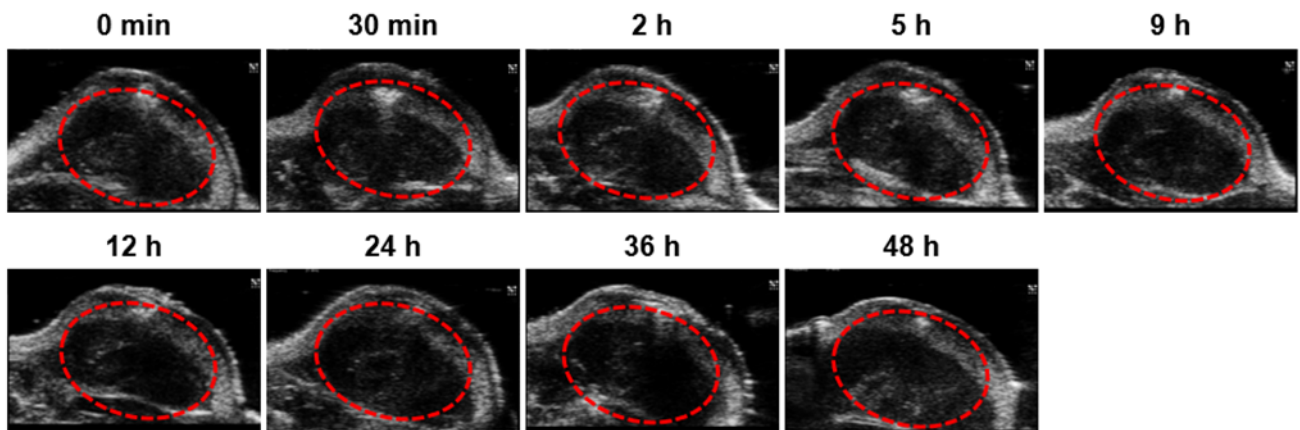

**Supplementary Fig. 19.** In vivo time-dependent ultrasonic imaging of 4T1 tumor-bearing mice post i.t. implanted with Mg rods. A representative image of three biologically independent samples.

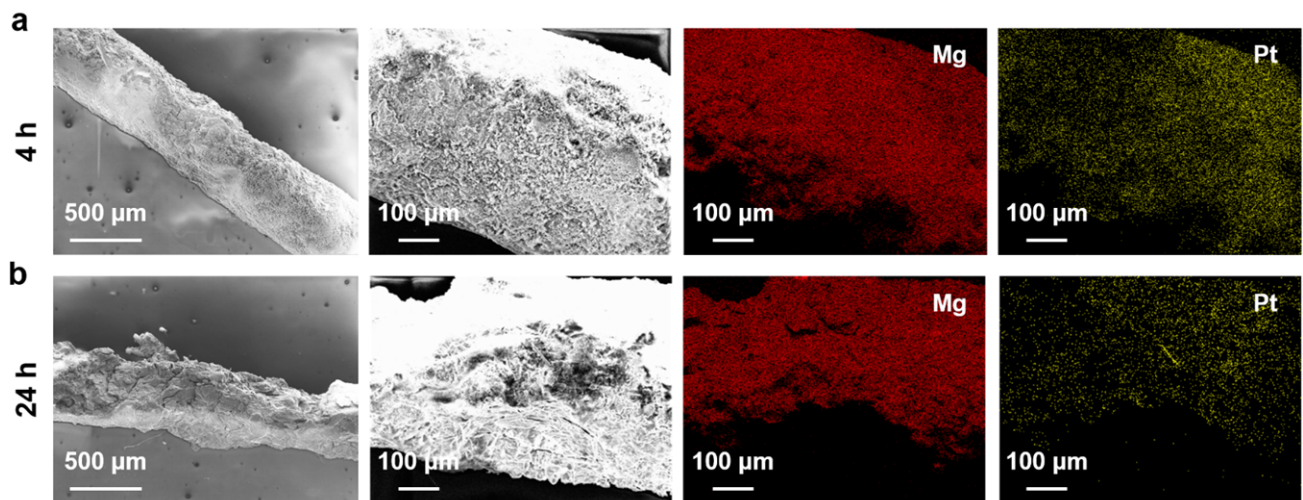

**Supplementary Fig. 20.** SEM image and EDS element mapping of MgG rods after implantation into the tumor for 4 h (a) and 24 h (b). A representative image of three biologically independent samples.

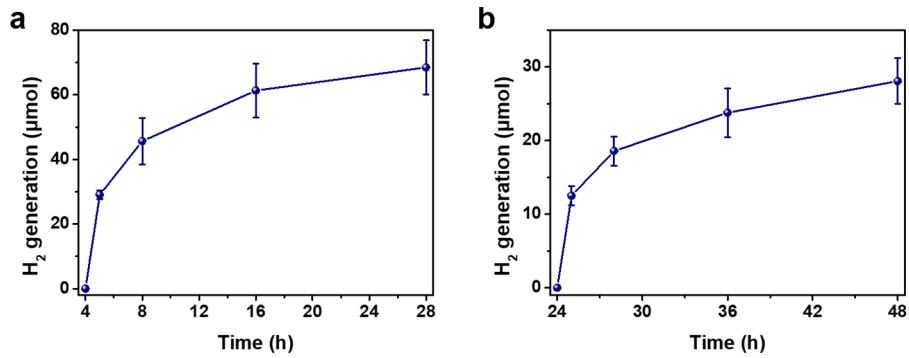

**Supplementary Fig. 21.** H<sub>2</sub> generation from MgG rods in PBS solutions after implantation into the tumor for 4 (a) and 24 hours (b) as measured by gas chromatography. (n = 3 biologically independent samples). Data are presented as mean values ±SD.

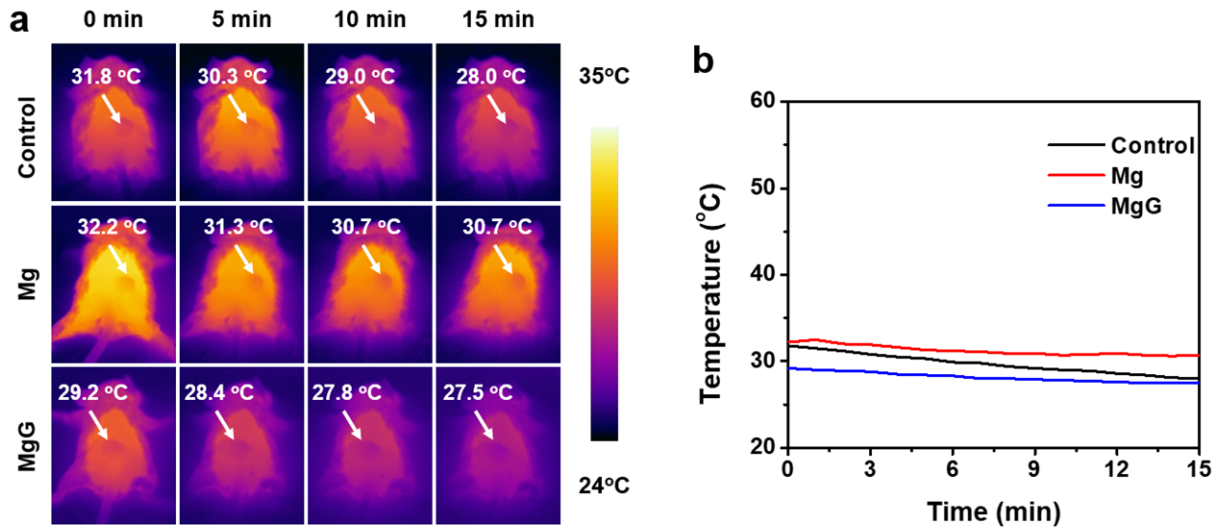

**Supplementary Fig. 22.** The infrared thermal images (a) and temperature change curves (b) of mice tumor at different time points via various treatments.

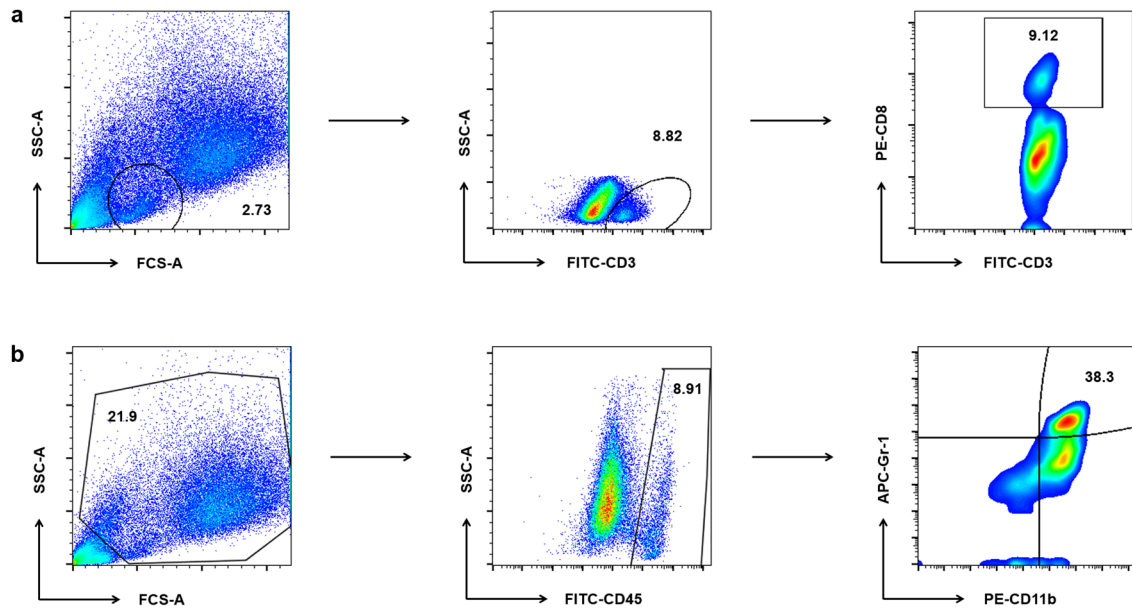

**Supplementary Fig. 23.** Flow cytometry gating strategy for analysis of different cells in tumor. (a) T cells ( $CD3^+$ ) and  $CD8^+$  T cells ( $CD3^+CD8^+$ ). (b) myeloid-derived suppressor cells (MDSCs,  $CD45^+CD11b^+Gr-1^+$ ).

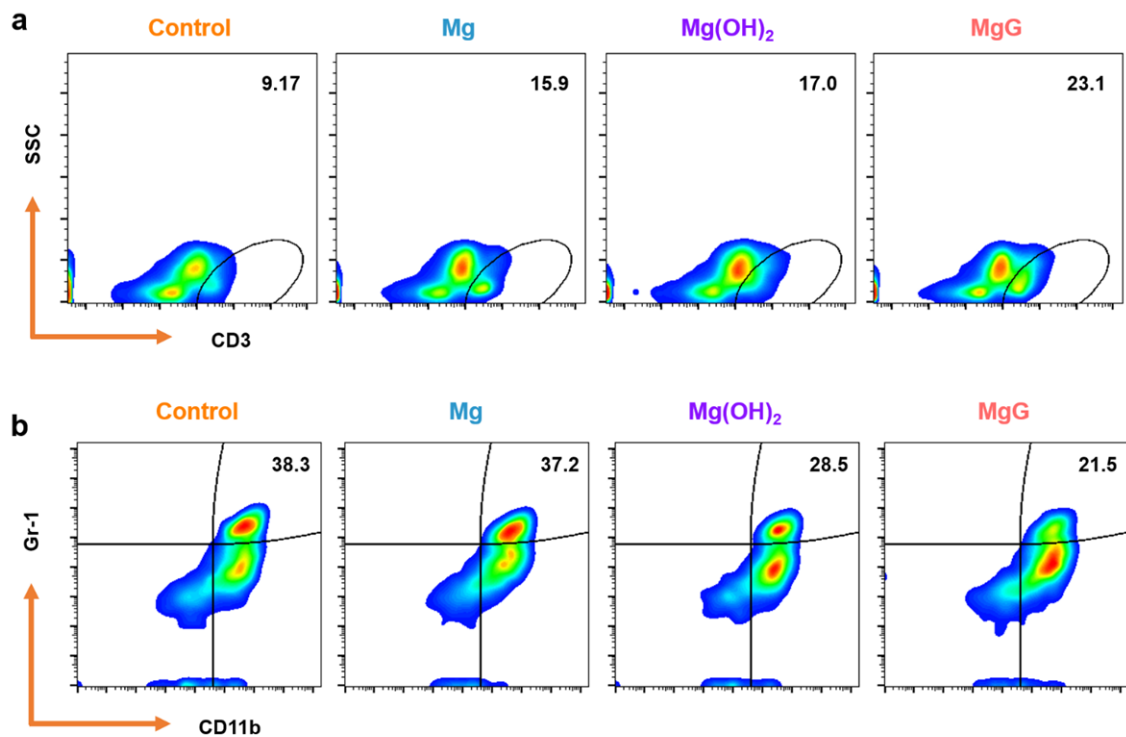

**Supplementary Fig. 24.** The flow cytometric analysis results of T cells (a,  $CD3^+$ ) and MDSCs (b,  $CD45^+CD11b^+Gr-1^+$ ) within the tumors after different treatments.

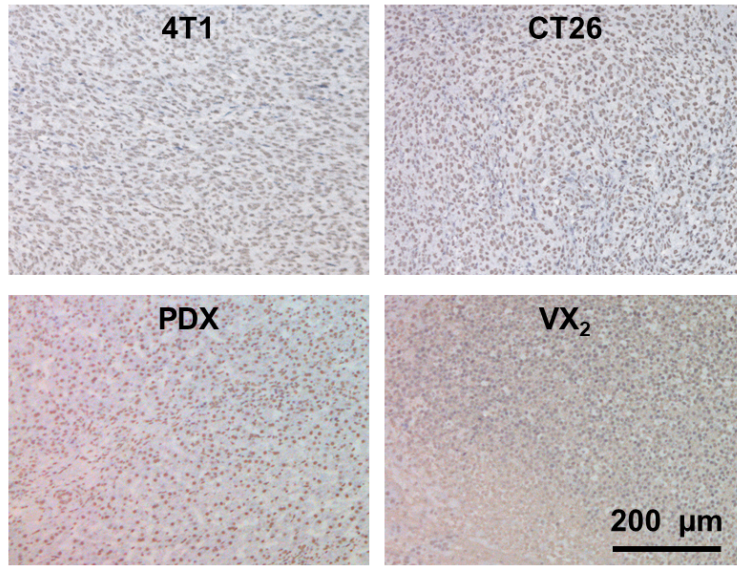

**Supplementary Fig. 25.** Microscopy images of TUNEL stained with the positive controls in different tumor sections. A representative image of three biologically independent animals.

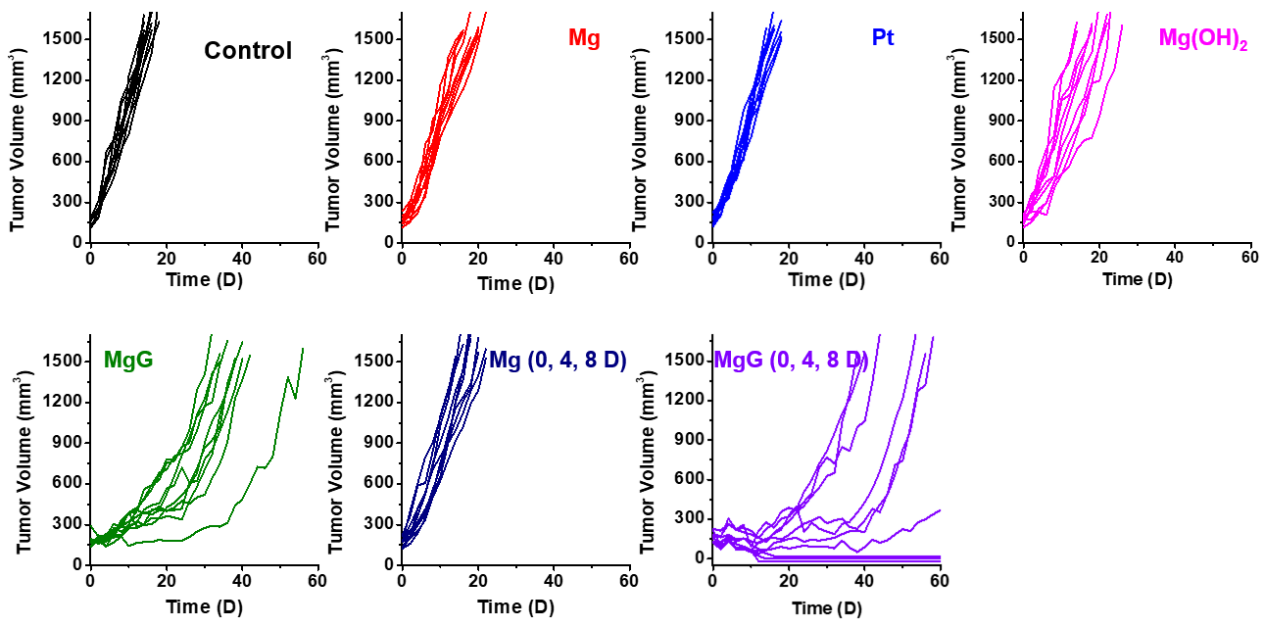

**Supplementary Fig. 26.** Individual growth curves of 4T1 tumors after various treatments.



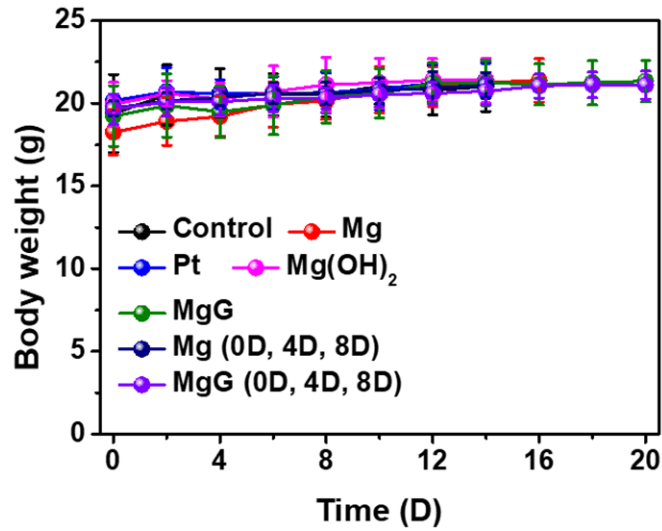

**Supplementary Fig. 27.** The body weight variation of 4T1 tumor-bearing mice post various treatments (n = 10 biologically independent animals). Data are presented as mean values  $\pm$ SD.

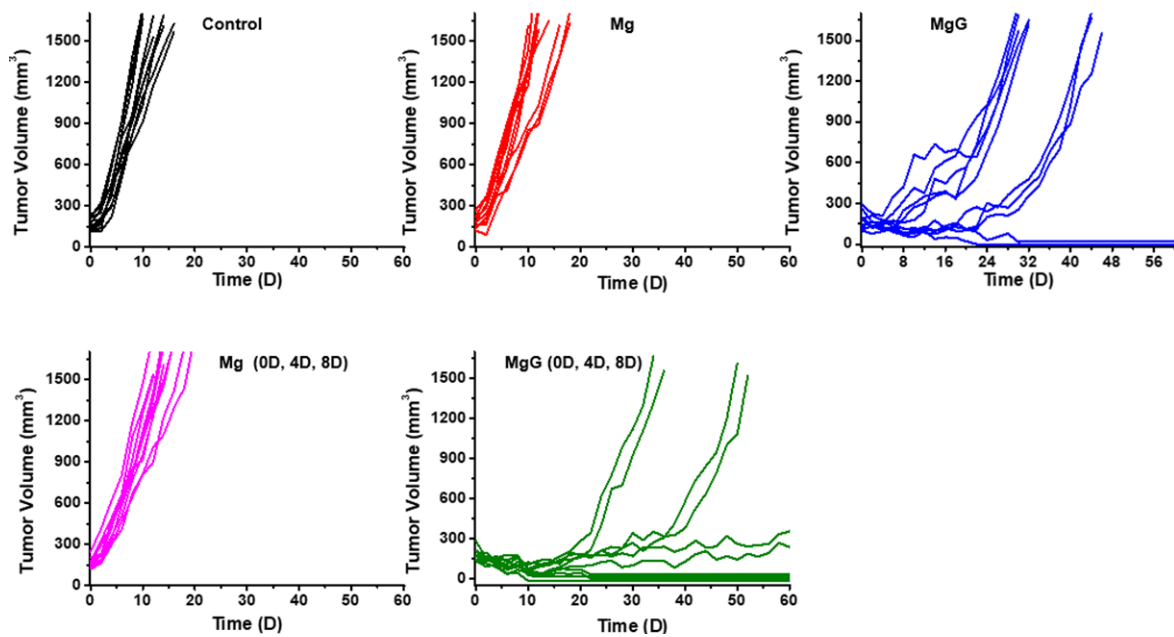

**Supplementary Fig. 28.** Individual growth curves of CT26 tumors after various treatments.

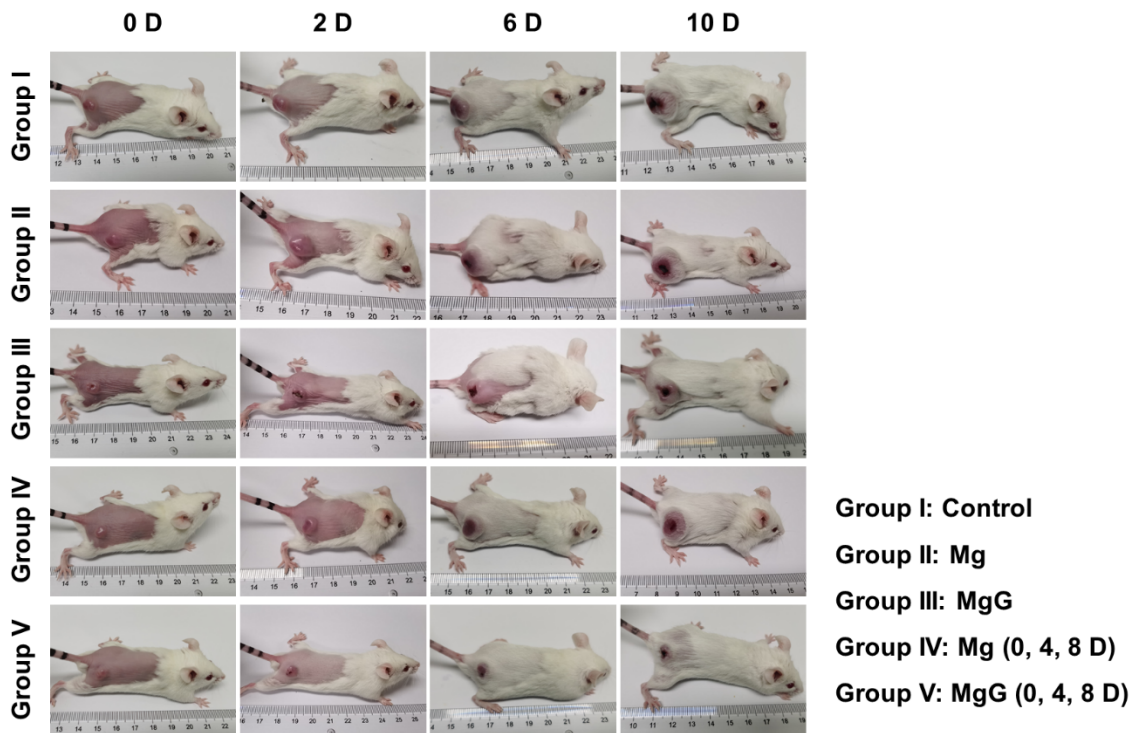

**Supplementary Fig. 29.** Photos of the representative CT26 tumor-bearing mice taken at different days after various treatments.

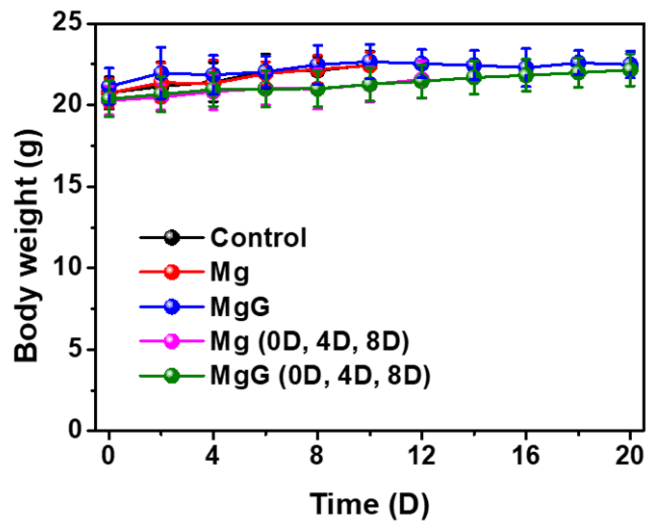

**Supplementary Fig. 30.** The body weight variation of CT26 tumor-bearing mice post various treatments (n = 10 biologically independent animals). Data are presented as mean values  $\pm$ SD.

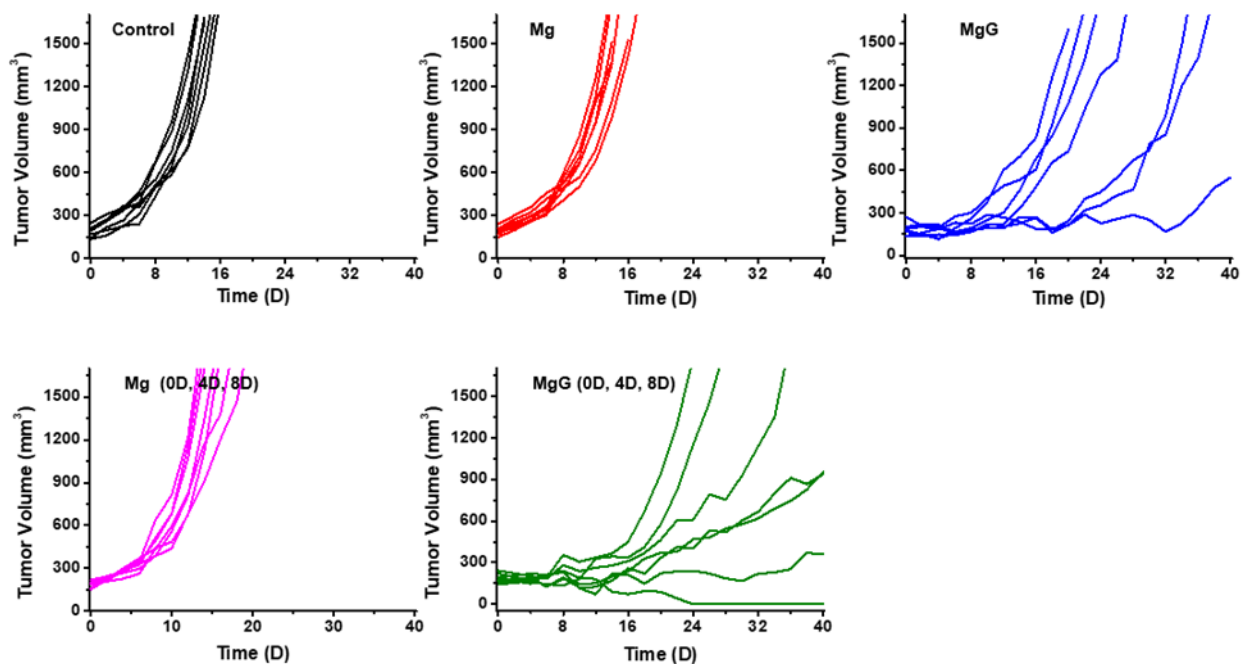

Supplementary Fig. 31. Individual growth curves of PDX tumors after various treatments.

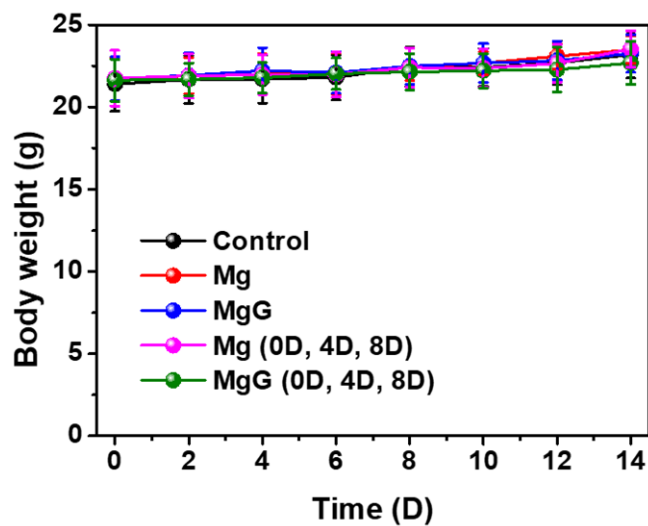

Supplementary Fig. 32. The body weight variation of PDX tumor-bearing mice post various treatments (n = 7 biologically independent animals). Data are presented as mean values  $\pm$ SD.

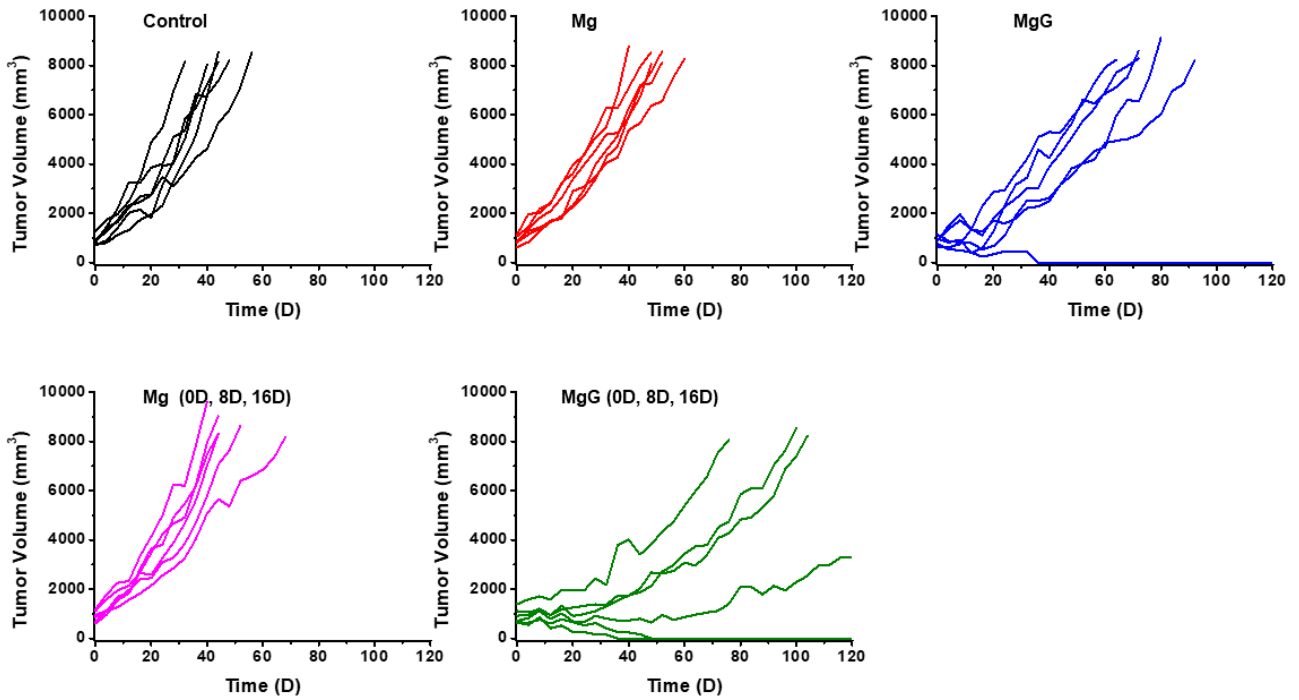

**Supplementary Fig. 33.** Individual growth curves of VX<sub>2</sub> tumors after various treatments.

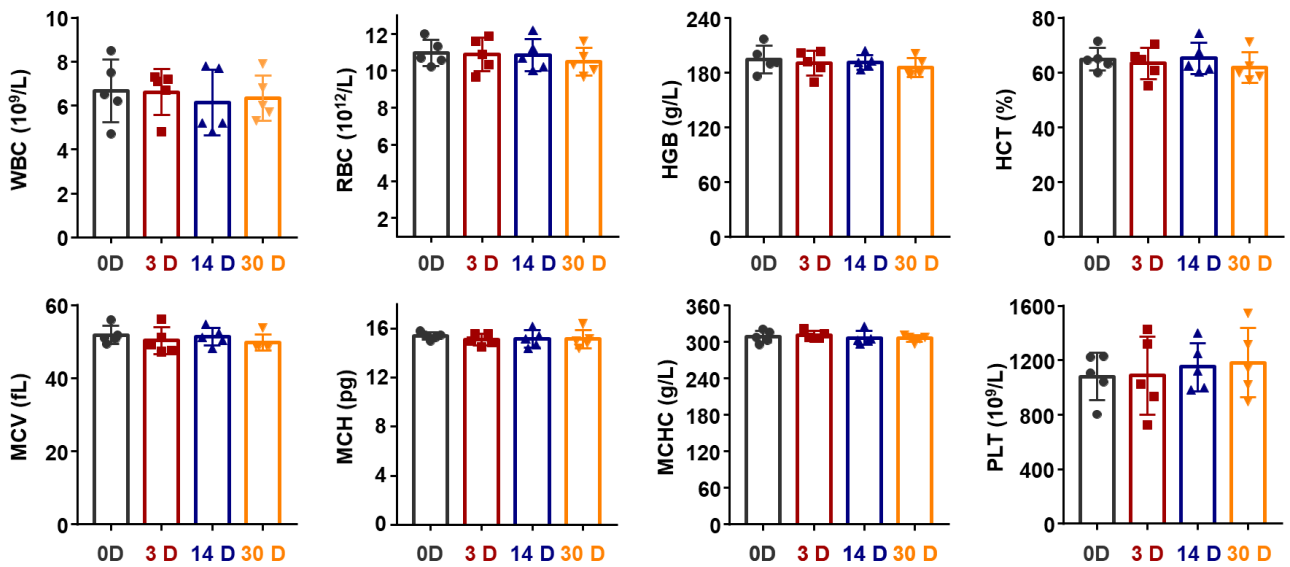

**Supplementary Fig. 34.** The hematology profiles of mice implanted with MgG rods (D = 0.5 mm, L = 4.0 mm, two rods per mouse) at various time points (0, 3, 14, and 30 D). n = 5 biologically independent animals. Data are presented as mean values  $\pm$ SD.
